# Supplementary material for: Single-cell transcriptomics reveals regulators underlying immune cell diversity and immune subtypes associated with prognosis in nasopharyngeal carcinoma
Source: PubMed Central journal article supplement (PMC7784929; doi:10.1038/s41422-020-0374-x), 2020-07-20
Supplement: 41422_2020_374_MOESM1_ESM.pdf [file 41422_2020_374_MOESM1_ESM.pdf]

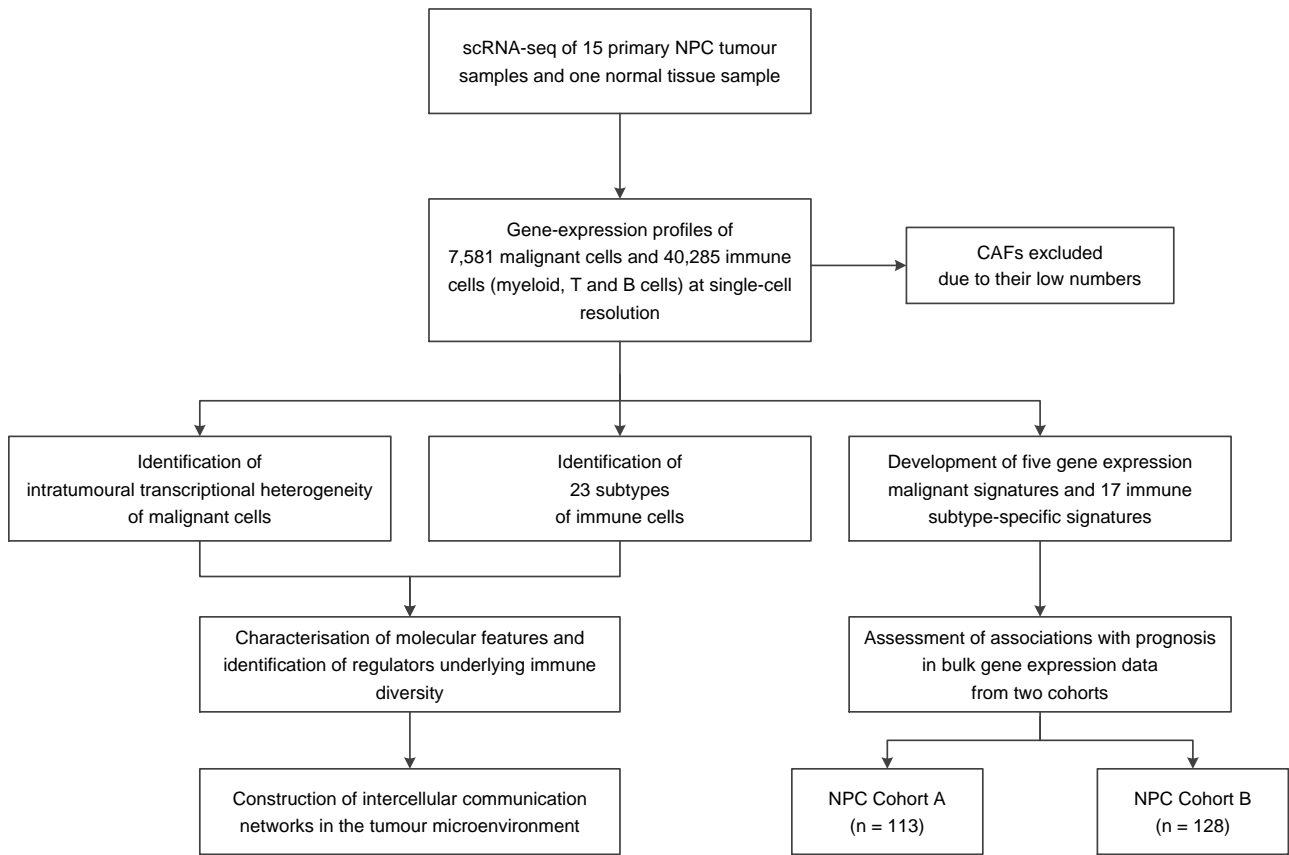

**Fig. S1. Study flow chart.** NPC, nasopharyngeal carcinoma; scRNA-seq, single-cell RNA sequencing; and CAF, cancer-associated fibroblast.
