# Supplementary material for: Single-cell transcriptomics reveals regulators underlying immune cell diversity and immune subtypes associated with prognosis in nasopharyngeal carcinoma
Source: PubMed Central journal article supplement (PMC7784929; doi:10.1038/s41422-020-0374-x), 2020-07-20
Supplement: 41422_2020_374_MOESM2_ESM.pdf [file 41422_2020_374_MOESM2_ESM.pdf]

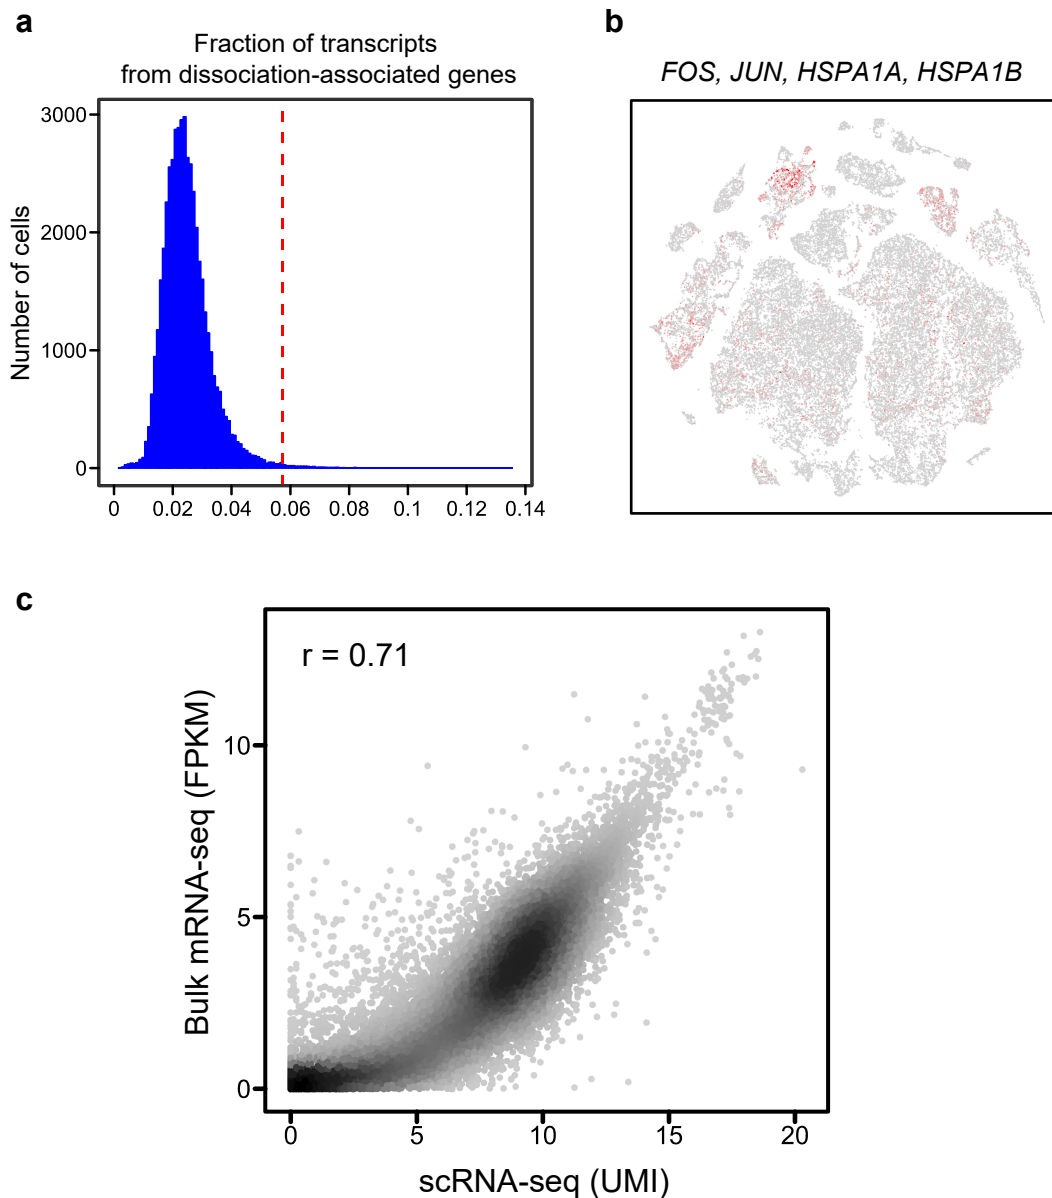

**Fig. S2. Effects of cell dissociation and the correlation between bulk RNA-seq and scRNA-seq data.** **a**, Histogram showing the fraction of gene expression attributed to dissociation-associated genes in the 48,584 cells profiled in this study. The red dotted line corresponds to the threshold described by Van Oudenaerden *et al.*<sup>17</sup> Their signature is based on detecting the upregulation of the expression of immediate-early genes (*FOS* and *JUN*) and stress-response genes (e.g., *HSPA1A* and *HSPA1B*). The plot shows that only a few cells (0.60%) are positive for the dissociation-response signature. Dissociation-associated artefacts were thus unlikely to be a major determinant of the cell subtypes identified in this study. **b**, tSNE plot of 48,584 cells colour coded for expression of the gene set (*FOS*, *JUN*, *HSPA1A*, and *HSPA1B*). **c**, Density dot plot and Pearson's correlation analysis ( $r$ ) of the gene expression in the scRNA-seq and bulk mRNA-seq data of 12 NPC samples.
