# Supplementary material for: Single-cell transcriptomics reveals regulators underlying immune cell diversity and immune subtypes associated with prognosis in nasopharyngeal carcinoma
Source: PubMed Central journal article supplement (PMC7784929; doi:10.1038/s41422-020-0374-x), 2020-07-20
Supplement: 41422_2020_374_MOESM3_ESM.pdf [file 41422_2020_374_MOESM3_ESM.pdf]

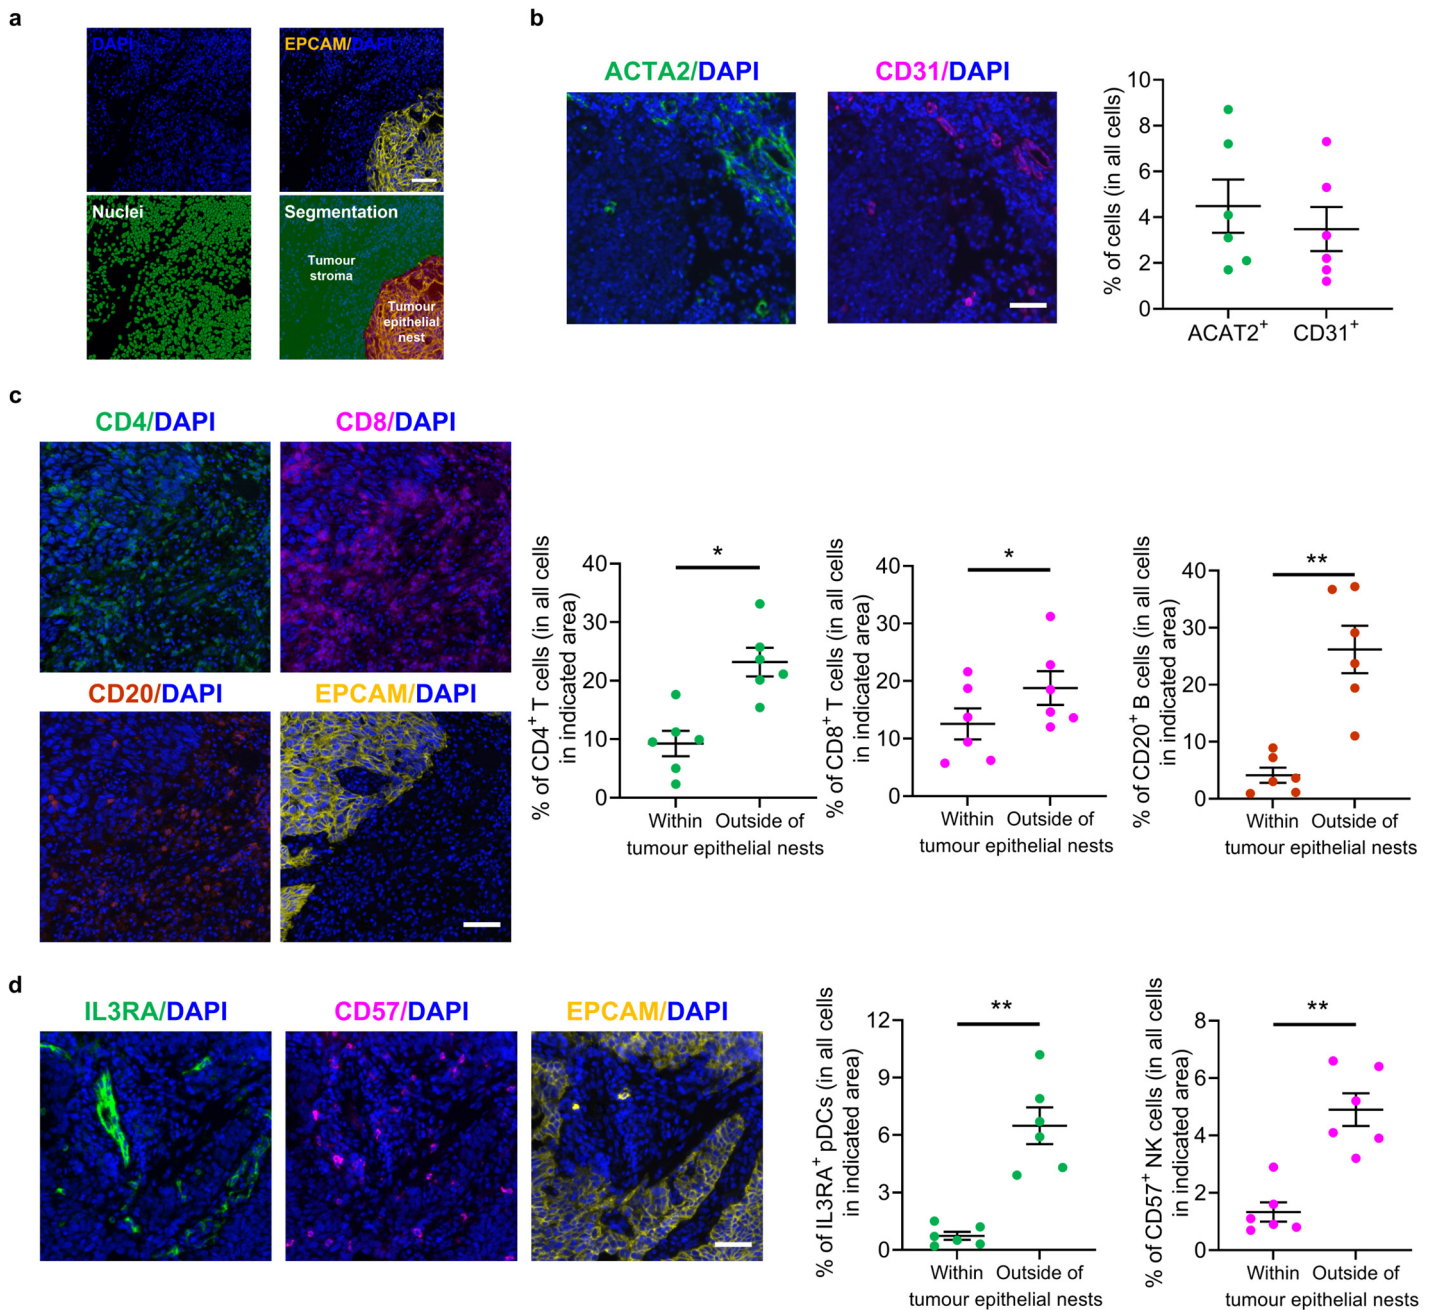

**Fig. S3. Multiplex immunofluorescence staining and automated image analysis.** **a**, Schematic illustration of the automated image analysis of multiplex immunofluorescence staining. **b**, Left, representative multiplex immunofluorescence images for ACTA2 and CD31 in an NPC tumour sample. Right, quantitation of ACTA2<sup>+</sup> and CD31<sup>+</sup> cells as a percentage of all cells ( $n = 6$ ). mean  $\pm$  s.e.m. **c**, Left, representative multiplex immunofluorescence images for CD4, CD8, CD20 and EPCAM in an NPC tumour sample. Right, quantitation of the percentages of CD4<sup>+</sup>, CD8<sup>+</sup>, and CD20<sup>+</sup> cells within and outside of the area of tumour epithelial nests ( $n = 6$ ). mean  $\pm$  s.e.m. **d**, Left, representative multiplex immunofluorescence images for IL3RA, CD57 and EPCAM in an NPC tumour sample. Right, quantitation of the percentage of IL3RA<sup>+</sup> and CD57<sup>+</sup> cells within and outside of the area of tumour epithelial nests ( $n = 6$ ). mean  $\pm$  s.e.m. Scale bar: 50  $\mu$ m. \* $P < 0.05$ , and \*\* $P < 0.01$  (paired Student's  $t$ -test).
