# Supplementary material for: Single-cell transcriptomics reveals regulators underlying immune cell diversity and immune subtypes associated with prognosis in nasopharyngeal carcinoma
Source: PubMed Central journal article supplement (PMC7784929; doi:10.1038/s41422-020-0374-x), 2020-07-20
Supplement: 41422_2020_374_MOESM6_ESM.pdf [file 41422_2020_374_MOESM6_ESM.pdf]

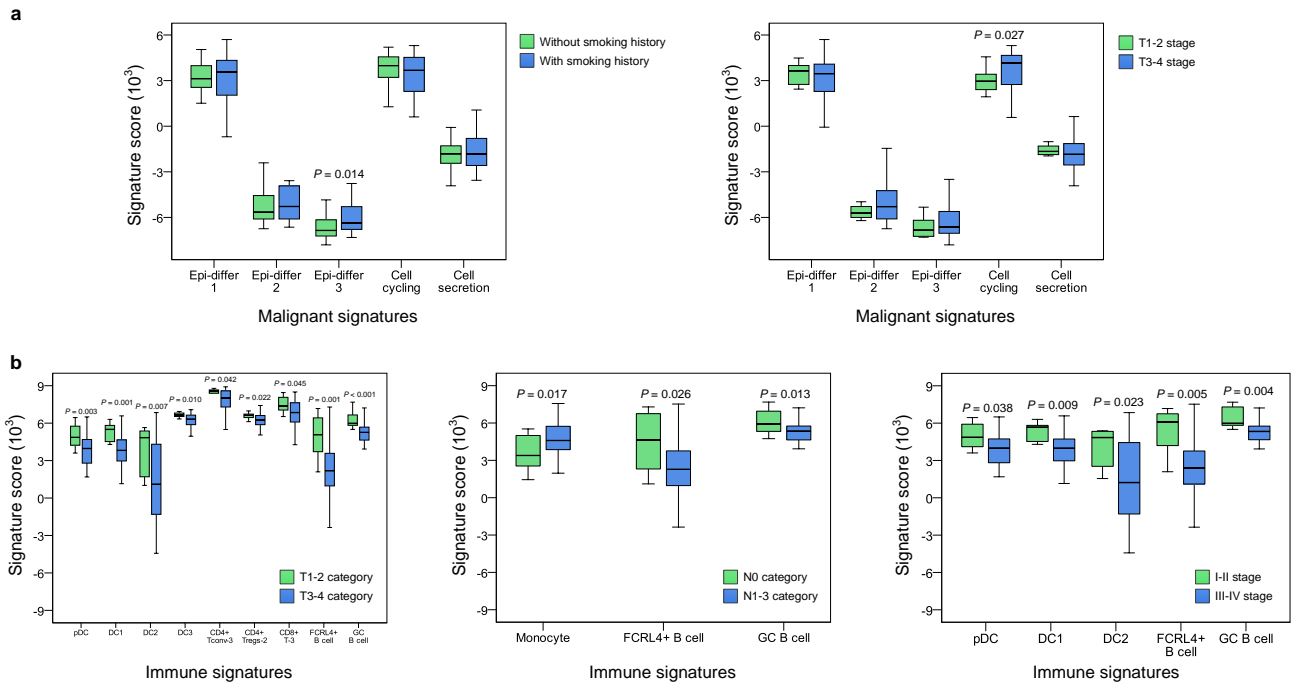

**Fig. S6. Correlations of malignant and immune signatures with clinicopathological features in NPC.** **a**, Changes in gene expression for the indicated five malignant signatures as a result of differences in smoking history and T category in NPC Cohort A. **b**, Changes in gene expression for the indicated immune signatures as a result of differences in T and N categories and clinical stage in NPC Cohort A. The box plot centre corresponds to the median, with the box and whiskers corresponding to the interquartile range and 1.5xinterquartile range, respectively. *P*-values were based on the Wilcoxon rank-sum test.
