# Supplementary material for: Single-cell transcriptomics reveals regulators underlying immune cell diversity and immune subtypes associated with prognosis in nasopharyngeal carcinoma
Source: PubMed Central journal article supplement (PMC7784929; doi:10.1038/s41422-020-0374-x), 2020-07-20
Supplement: 41422_2020_374_MOESM8_ESM.pdf [file 41422_2020_374_MOESM8_ESM.pdf]

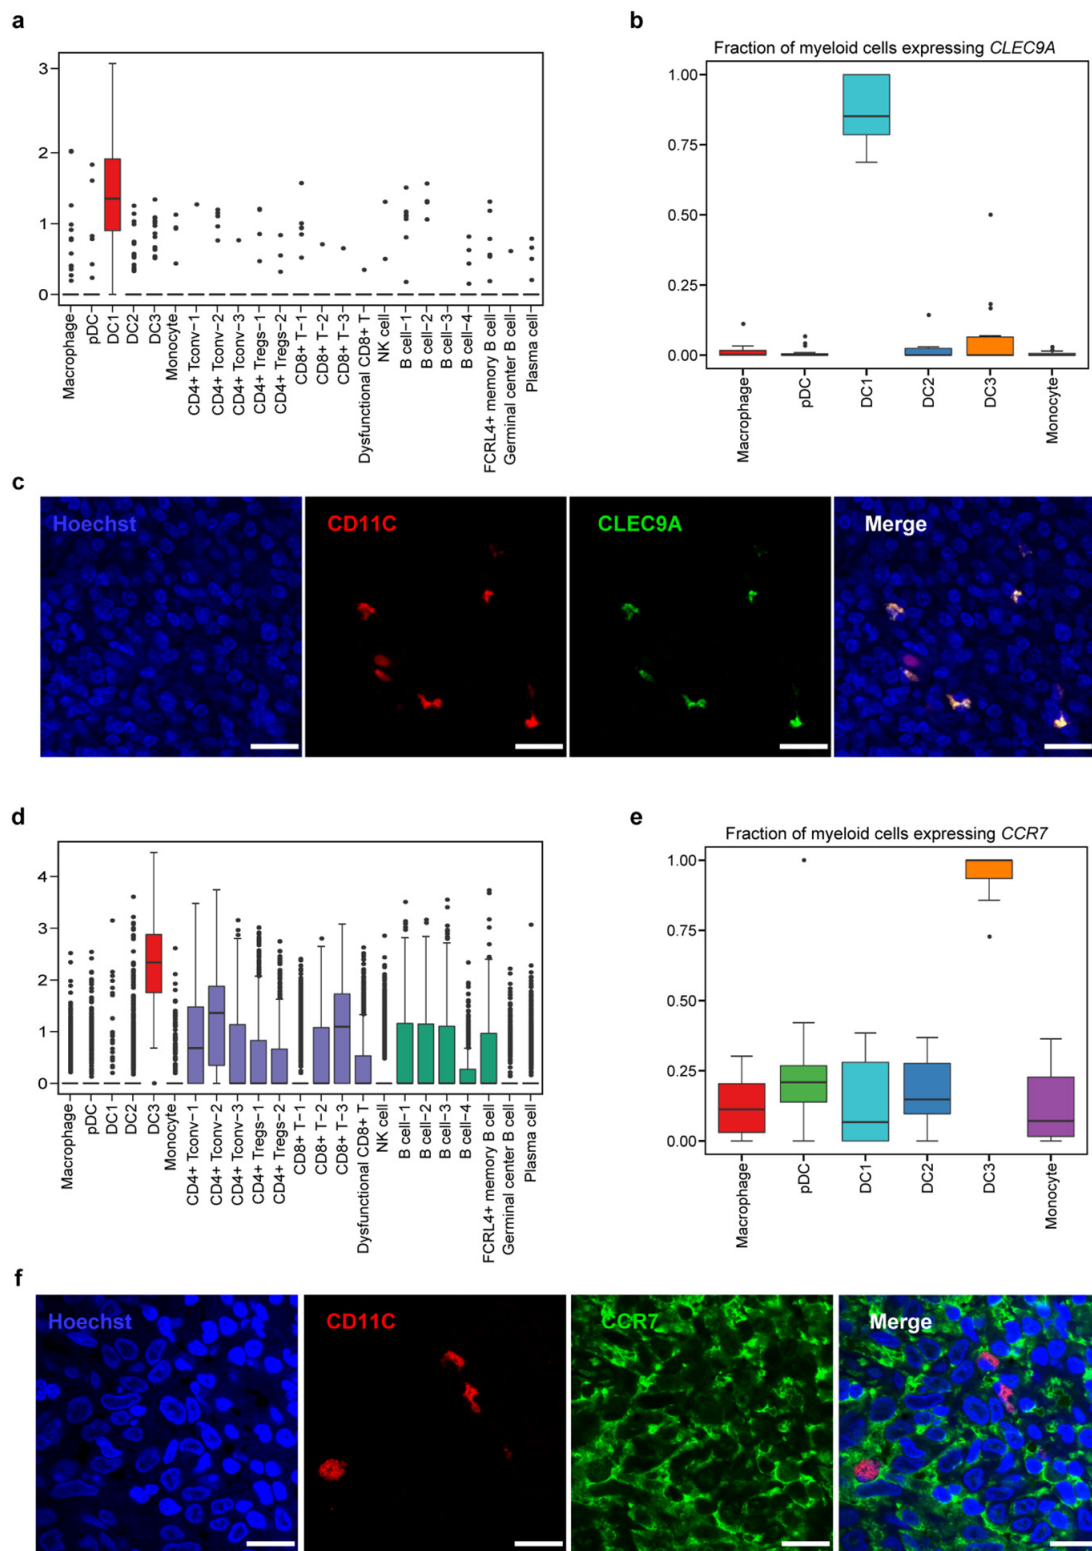

**Fig. S8. Confirmation of the existence of *CLEC9A*<sup>+</sup> and *CCR7*<sup>+</sup> subsets of dendritic cells (DCs) in NPC.** DCs express CD11c. **(a, d)** Box plots of *CLEC9A* (a) and *CCR7* (d) expression in the 23 immune cell subtypes, illustrating cell subtype-specific expression (DC1 and DC3 express *CLEC9A* and *CCR7*, respectively). The box plot centre corresponds to the median, with the box, whiskers and points corresponding to the interquartile range, 1.5×interquartile range, and outliers, respectively. **(b, e)** Box plot quantification of the fraction of each myeloid cell subtype expressing *CLEC9A* (b) or *CCR7* (e). Box plot center corresponds to median, with box, whisker, and points corresponding to interquartile range, 1.5×interquartile range, and outliers respectively. **(c, f)** Immunofluorescence images of (c) CD11c and *CLEC9A* staining or (f) CD11c and *CCR7* staining of an NPC tissue sample. Images are representative of seven independent samples for (c) and nine independent samples for (f). Scale bar: 20 μm.
