# Supplementary material for: Single-cell transcriptomics reveals regulators underlying immune cell diversity and immune subtypes associated with prognosis in nasopharyngeal carcinoma
Source: PubMed Central journal article supplement (PMC7784929; doi:10.1038/s41422-020-0374-x), 2020-07-20
Supplement: 41422_2020_374_MOESM10_ESM.pdf [file 41422_2020_374_MOESM10_ESM.pdf]

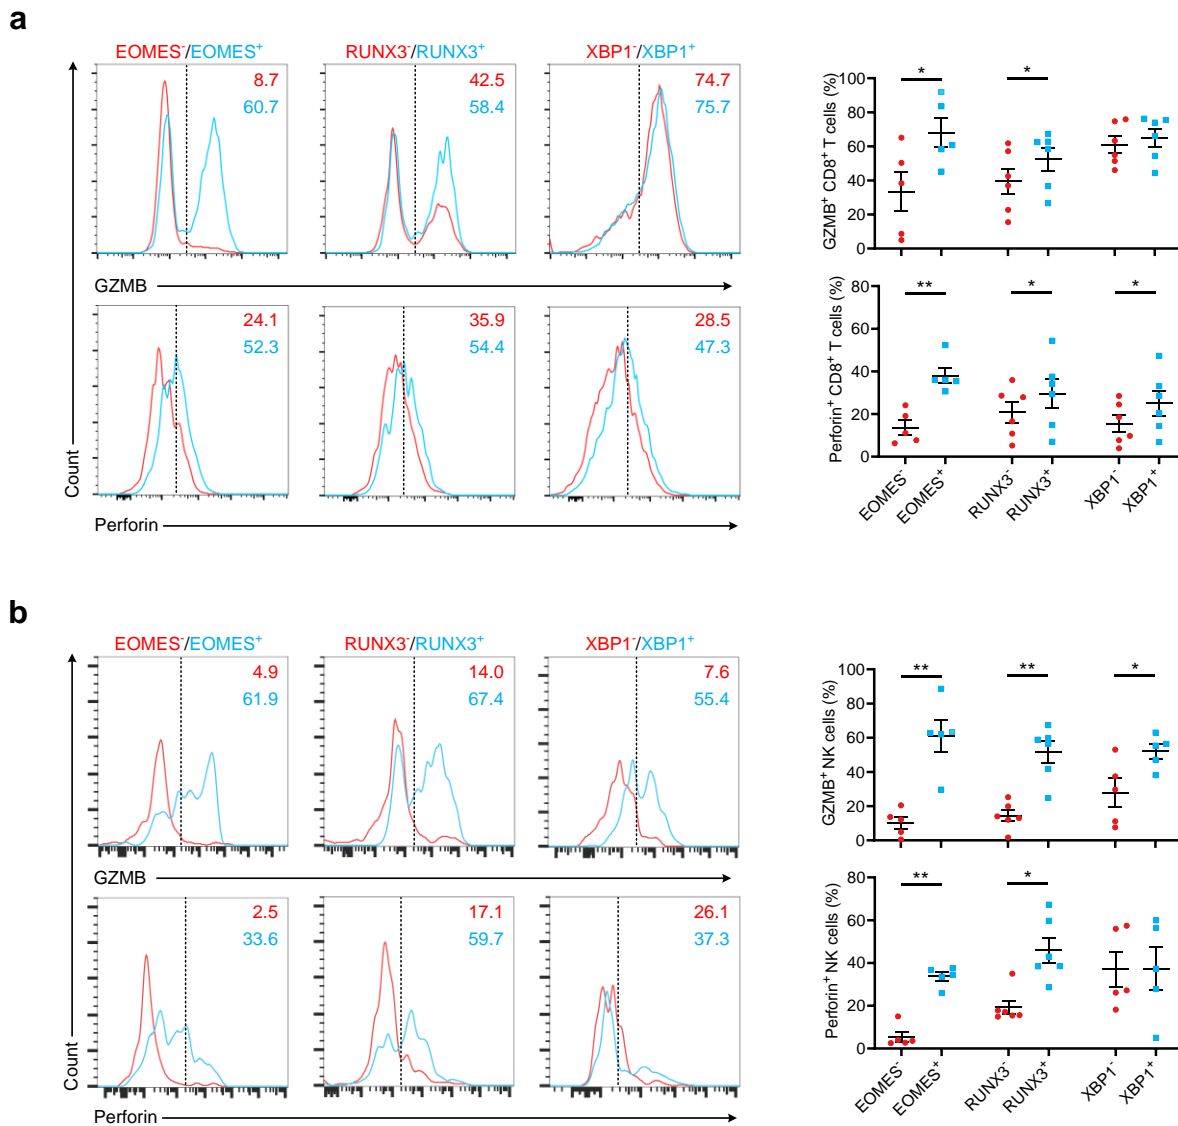

**Fig. S10. Correlations between the expression of EOMES/RUNX3/XBP1 and GZMB/perforin in CD8<sup>+</sup> T cells and NK cells in NPC.** **a**, Left, representative histograms depicting the expression of GZMB and perforin on EOMES<sup>-</sup> and EOMES<sup>+</sup> ( $n = 5$  donors,  $n = 3$  independent experiments), RUNX3<sup>-</sup> and RUNX3<sup>+</sup> ( $n = 6$  donors,  $n = 6$  independent experiments), and XBP1<sup>-</sup> and XBP1<sup>+</sup> ( $n = 6$  donors,  $n = 5$  independent experiments) CD8<sup>+</sup> T cells from tumour tissues. Right, associations of EOMES<sup>+</sup> ( $n = 5$ ), RUNX3<sup>+</sup> ( $n = 6$ ), and XBP1<sup>+</sup> ( $n = 6$ ) CD8<sup>+</sup> T cells with GZMB<sup>+</sup> or perforin<sup>+</sup> CD8<sup>+</sup> T cells from tumour tissues. **b**, Left, representative histograms depicting the expression of GZMB and perforin on EOMES<sup>-</sup> and EOMES<sup>+</sup> ( $n = 5$  donors,  $n = 4$  independent experiments), RUNX3<sup>-</sup> and RUNX3<sup>+</sup> ( $n = 6$  donors,  $n = 6$  independent experiments), and XBP1<sup>-</sup> and XBP1<sup>+</sup> ( $n = 5$  donors,  $n = 5$  independent experiments) NK cells from tumour tissues. Right, associations of EOMES<sup>+</sup> ( $n = 5$ ), RUNX3<sup>+</sup> ( $n = 6$ ), and XBP1<sup>+</sup> ( $n = 5$ ) NK cells with GZMB<sup>+</sup> or perforin<sup>+</sup> NK cells from tumour tissues. \*  $P < 0.05$ , and \*\*  $P < 0.01$  (paired Student's  $t$ -test). Error bars, s.e.m.
