# Supplementary material for: Single-cell transcriptomics reveals regulators underlying immune cell diversity and immune subtypes associated with prognosis in nasopharyngeal carcinoma
Source: PubMed Central journal article supplement (PMC7784929; doi:10.1038/s41422-020-0374-x), 2020-07-20
Supplement: 41422_2020_374_MOESM12_ESM.pdf [file 41422_2020_374_MOESM12_ESM.pdf]

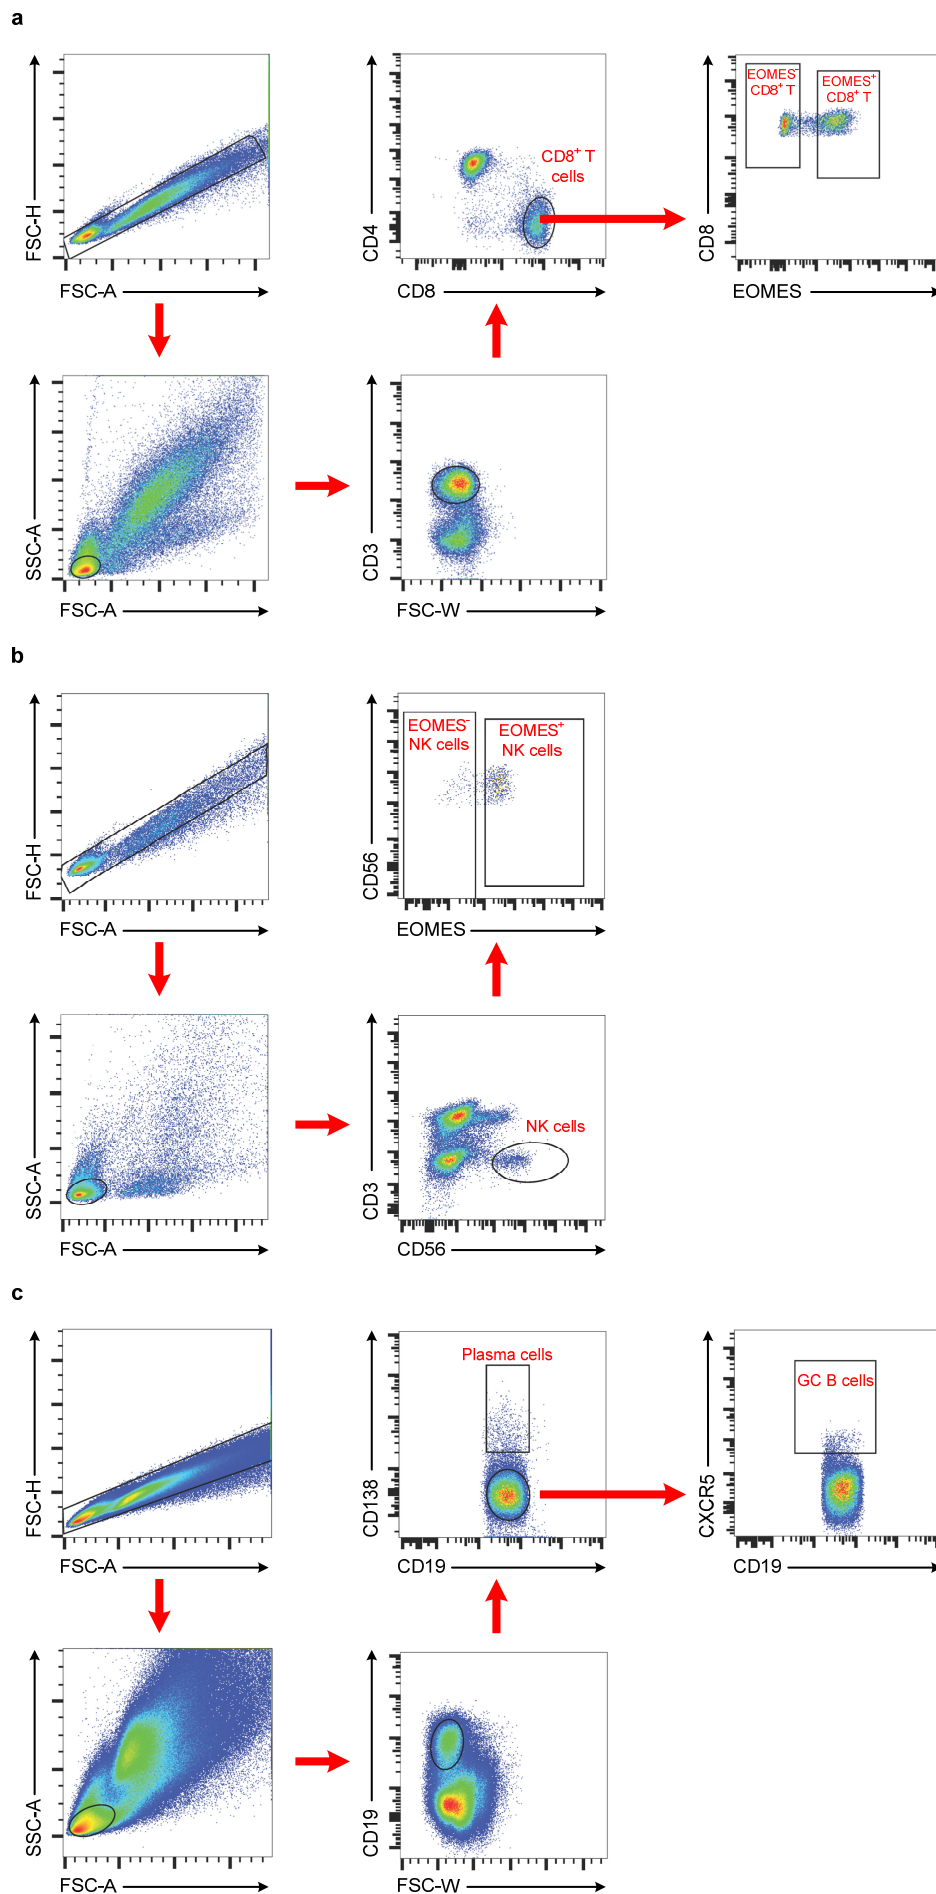

**Fig. S12. Flow cytometry gating strategy for identification of tumor-infiltrating leukocytes in NPC.** **a**, Identification of EOMES<sup>+</sup> and EOMES<sup>-</sup> CD8<sup>+</sup> T cells. **b**, Identification of EOMES<sup>+</sup> and EOMES<sup>-</sup> NK cells. **c**, Identification of plasma cells and GC B cells. Identified cell types are marked by red text.
