# Supplementary material for: Single-cell transcriptomics reveals regulators underlying immune cell diversity and immune subtypes associated with prognosis in nasopharyngeal carcinoma
Source: PubMed Central journal article supplement (PMC7784929; doi:10.1038/s41422-020-0374-x), 2020-07-20
Supplement: 41422_2020_374_MOESM13_ESM.pdf [file 41422_2020_374_MOESM13_ESM.pdf]

**Table S1. Characteristics of the 15 patients with NPC and one patient with chronic nasopharyngitis included in this study**

| Patient ID | Sex    | Age | Histology | TNM stage* | Clinical stage* | Smoking history | Pretreatment plasma EBV DNA (copies/mL) | Bulk WES | Bulk RNA-seq | EBV status† |
|------------|--------|-----|-----------|------------|-----------------|-----------------|-----------------------------------------|----------|--------------|-------------|
| P01        | Male   | 37  | NKNPC     | T3N1M0     | III             | Yes             | 1.16 * 10 <sup>4</sup>                  | Yes      | Yes          | +           |
| P02        | Female | 38  | NKNPC     | T2N3M0     | IVA             | No              | 1.91 * 10 <sup>3</sup>                  | Yes      | Yes          | +           |
| P03        | Female | 31  | KNPC      | T1N2M0     | III             | No              | 0                                       | Yes      | Yes          | -           |
| P04        | Male   | 58  | NKNPC     | T4N3M1     | IVB             | Yes             | 0                                       | Yes      | Yes          | +           |
| P05        | Male   | 74  | NKNPC     | T3N0M0     | III             | No              | 1.38 * 10 <sup>3</sup>                  | Yes      | Yes          | +           |
| P06        | Female | 36  | NKNPC     | T2N2M0     | III             | No              | 1.23 * 10 <sup>4</sup>                  | Yes      | Yes          | +           |
| P07        | Male   | 45  | NKNPC     | T3N1M0     | III             | No              | 7.90 * 10 <sup>2</sup>                  | Yes      | Yes          | +           |
| P08        | Male   | 61  | NKNPC     | T2N1M0     | II              | Yes             | 2.84 * 10 <sup>3</sup>                  | Yes      | Yes          | +           |
| P09        | Male   | 51  | NKNPC     | T2N3M0     | IVA             | No              | 0                                       | No       | No           | +           |
| P10        | Male   | 57  | NKNPC     | T4N1M0     | IVA             | Yes             | 0                                       | Yes      | Yes          | -           |
| P11        | Male   | 44  | NKNPC     | T1N1M0     | II              | Yes             | 0                                       | Yes      | Yes          | +           |
| P12        | Male   | 32  | NKNPC     | T4N2M0     | IVA             | No              | 9.90 * 10 <sup>3</sup>                  | Yes      | Yes          | +           |
| P13        | Female | 41  | NKNPC     | rT2N0M0    | rII             | No              | 0                                       | No       | No           | +           |
| P14        | Female | 54  | NKNPC     | T4N2M1     | IVB             | No              | 7.00 * 10 <sup>6</sup>                  | Yes      | Yes          | +           |
| P15        | Male   | 32  | NKNPC     | T2N0M0     | II              | No              | 1.06 * 10 <sup>2</sup>                  | No       | No           | +           |
| N01        | Female | 20  | CNP       | --         | --              | No              | 0                                       | No       | No           | -           |

\*According to the 8<sup>th</sup> American Joint Committee on Cancer (AJCC)/Union for International Cancer Control (UICC) staging system.

† Detected by In situ hybridization to the EBV-encoded small RNAs (EBERs).

NPC, nasopharyngeal carcinoma; NKNPC, non-keratinizing NPC; KNPC, keratinizing NPC; CNP, chronic nasopharyngitis; EBV, Epstein-Barr virus; WES, whole-exome sequencing.
