# Supplementary material for: Single-cell transcriptomics reveals regulators underlying immune cell diversity and immune subtypes associated with prognosis in nasopharyngeal carcinoma
Source: PubMed Central journal article supplement (PMC7784929; doi:10.1038/s41422-020-0374-x), 2020-07-20
Supplement: 41422_2020_374_MOESM15_ESM.pdf [file 41422_2020_374_MOESM15_ESM.pdf]

**Table S3. Immune cell cluster characteristics**

| Cluster   | Annated Name               | Cells | Genes (Mean) | UMIs (Mean) | Marker Genes                                                                                                                                                                                                                                                                                                               |
|-----------|----------------------------|-------|--------------|-------------|----------------------------------------------------------------------------------------------------------------------------------------------------------------------------------------------------------------------------------------------------------------------------------------------------------------------------|
| Myeloid 0 | Macrophage                 | 1,837 | 2,840        | 12,269      | APOE, APOC1, RNASE1, CTSL, C1QA, C1QB, C1QC, CTSD, ADAMDEC1, SPP1, FTL, NUPR1, GPNMB, FCGR3A, CCL8, PLD3, LGMN, GLUL, CTSC, CD163, PSAP, CTSB, CCL3, HES1, MMP9, MS4A4A, IFIT1, ACP5, PLA2G7, CD68, MAFB, CD14, IFI6, TREM2, MS4A7, PRDX1, ASAH1, LGALS3, CCL4, IFI27, MARCKS, CREG1, CD81, SLC40A1, CTSS, FCER1G, CXCL9   |
| Myeloid 1 | DC2 (CD1C <sup>+</sup> )   | 1,394 | 2,940        | 13,398      | S100B, HLA-DQB2, FCER1A, CD1A, PKIB, NDRG2                                                                                                                                                                                                                                                                                 |
| Myeloid 2 | pDC                        | 826   | 2,240        | 8,726       | PTGDS, GZMB, IGJ, TCL1A, LILRA4, PLAC8, ITM2C, IRF7, PPP1R14B, TCF4, TSPAN13, CLIC3, SELL, PLD4, UGCG, CCDC50, C12orf75, BCL11A, MZB1, PTCRA, SPIB, LRRC26, SMPD3, MAP1A, ALOX5AP, SCT, PTPRS, IL3RA, APP, CYB561A3, SEC61B, SPCS1, CLEC4C, SLC15A4, HIGD1A, NUCB2, MPEG1, LTB, GAPT, IDH3A, LAMP5, C10orf118, TRAF4, OFD1 |
| Myeloid 3 | Monocyte                   | 545   | 2,241        | 9,043       | S100A8, TIMP1, S100A9, IL1B, FCN1, VCAN, IL8, S100A12, APOBEC3B, G0S2, CCL2, S100A4, CCL20, APOBEC3A, SOD2, IL1RN, FPR1, C15orf48, EREG                                                                                                                                                                                    |
| Myeloid 4 | DC3 (CCR7 <sup>+</sup> )   | 362   | 2,482        | 11,249      | BIRC3, CCL19, FSCN1, CCR7, CCL22, MARCKSL1, TXN, CCL17, LAMP3, CRIP1, NUB1, IDO1, KIF2A, SAMSN1, ID2, CD83, CST7, RAB9A, LSP1, TBC1D4, EBI3, ANXA6, BTG1, GRSF1, CSF2RA, LAD1, PNRC1, GPR157, BASP1, PLA2G16, DUSP4, DAPP1, RAMP1, AOC1, NCCRP1, PPA1, MAP3K13, STK4, UBD, IL32, LY75, FAM60A, ERICH1, RPS27L              |
| Myeloid 5 | DC1 (CLEC9A <sup>+</sup> ) | 227   | 2,606        | 12,918      | RGCC, CPVL, CLEC9A, CPNE3, C1orf54, DNASE1L3, SNX3, CCND1, IRF8, LGALS2, CLNK, CST3, NAAA, SERPINB1, PPT1, XCR1                                                                                                                                                                                                            |
| T cell 0  | CD4 <sup>+</sup> Tregs-1   | 3,146 | 2,143        | 6,894       | NA                                                                                                                                                                                                                                                                                                                         |
| T cell 1  | CD8 <sup>+</sup> T-1       | 2,589 | 2,003        | 6,206       | GZMH, GZMA, CCL5                                                                                                                                                                                                                                                                                                           |
| T cell 2  | CD4 <sup>+</sup> Tconv-1   | 2,358 | 1,806        | 5,993       | NA                                                                                                                                                                                                                                                                                                                         |
| T cell 3  | CD4 <sup>+</sup> Tconv-2   | 2,212 | 1,606        | 6,329       | NA                                                                                                                                                                                                                                                                                                                         |

|          |                                  |       |       |        |                                                                                                                                                                                                                                                                                                                                                                                                                                                                                                                      |
|----------|----------------------------------|-------|-------|--------|----------------------------------------------------------------------------------------------------------------------------------------------------------------------------------------------------------------------------------------------------------------------------------------------------------------------------------------------------------------------------------------------------------------------------------------------------------------------------------------------------------------------|
| T cell 4 | CD8 <sup>+</sup> T-2             | 2,142 | 1,802 | 5,889  | NA                                                                                                                                                                                                                                                                                                                                                                                                                                                                                                                   |
| T cell 5 | Dysfunctional CD8 <sup>+</sup> T | 1,356 | 2,418 | 8,177  | CCL4, CCL3, GZMB, NKG7, GZMK, IFNG, HIST1H4C, LAG3, HAVCR2                                                                                                                                                                                                                                                                                                                                                                                                                                                           |
| T cell 6 | CD4 <sup>+</sup> Tregs-2         | 1,218 | 2,562 | 9,170  | TNFRSF4, TNFRSF18, TNFRSF9, IL2RA, PKM, HSP90AB1, BATF                                                                                                                                                                                                                                                                                                                                                                                                                                                               |
| T cell 7 | CD4 <sup>+</sup> Tconv-3         | 1,124 | 2,151 | 6,995  | CXCL13                                                                                                                                                                                                                                                                                                                                                                                                                                                                                                               |
| T cell 8 | CD8 <sup>+</sup> T-3             | 888   | 1,941 | 6,782  | IFIT3, ISG15, IFIT1, IFIT2, RSAD2, MX1, MT2A                                                                                                                                                                                                                                                                                                                                                                                                                                                                         |
| T cell 9 | NK cell                          | 708   | 2,031 | 6,380  | GNLY, TYROBP, KLRC1, FCER1G, XCL1, XCL2, KLRD1, CTSW, IFITM3, HOPX, KLRF1, KLRC2, PRF1                                                                                                                                                                                                                                                                                                                                                                                                                               |
| B cell 0 | B cell-1                         | 6,017 | 1,619 | 6,208  | NA                                                                                                                                                                                                                                                                                                                                                                                                                                                                                                                   |
| B cell 1 | B cell-2                         | 5,353 | 1,672 | 5,478  | NA                                                                                                                                                                                                                                                                                                                                                                                                                                                                                                                   |
| B cell 2 | Plasma cell                      | 2,022 | 2,430 | 9,970  | IGJ, XBP1, MZB1, SSR4, DERL3, FKBP11, HSP90B1, ITM2C, SEC11C, PRDX4, FKBP2, HERPUD1, JUN, SSR3, VIMP, SDF2L1, SELK, SPCS2, MANF, C19orf10, SPCS3, HSPA5, IFI6, PPIB, RRBP1, SEC61B, DNAJB9, PIM2, SPCS1, CD63, PDIA4, ERLEC1, NUCB2, TNFRSF17, SEC61G, LMAN1, JSRP1, TMEM258, TMEM59, RPN2, RABAC1, SDC1, LGALS1, KDELR2, CRELD2, IFI27, SUB1, PSAP, GSTP1, CD38, NPC2, TMED10, ARF4, NEAT1, KRTPCAP2, TMED9, SELM, PDIA6, SLAMF7, HM13, P4HB, SRGN, TMED2, TXNDC15, CD27, KDELR1, TRAM1, HLA-C, CD59, TMBIM6, TIMP1 |
| B cell 3 | FCRL4 <sup>+</sup> memory B cell | 1,890 | 2,257 | 8,655  | FCRL4, ISG15                                                                                                                                                                                                                                                                                                                                                                                                                                                                                                         |
| B cell 4 | B cell-3                         | 897   | 2,263 | 9,560  | FABP5, HSP90AB1, ENO1, LDHA, NME1                                                                                                                                                                                                                                                                                                                                                                                                                                                                                    |
| B cell 5 | Germinal center B cell           | 595   | 2,564 | 9,985  | MARCKSL1, RGS13, HMGN1, TCL1A, NEIL1, HMCES, ACTG1, LRMP, LPP, GAPDH, SYNE2, SERPINA9, DAAM1, BCL7A, HMGN2, SERF2, SUGCT, PTTG1, SNX29P2, EZR, RFTN1, HMGA1, UCP2                                                                                                                                                                                                                                                                                                                                                    |
| B cell 6 | B cell-4                         | 579   | 2,727 | 16,830 | IGLL5, HIST1H4C, HMGB2, STMN1, MKI67, KIAA0101, TUBA1B, TUBB, H2AFZ, TOP2A, TK1, DUT, UBE2C, CENPF, NUSAP1, TYMS, RRM2                                                                                                                                                                                                                                                                                                                                                                                               |

---
