# Supplementary material for: Single-cell transcriptomics reveals regulators underlying immune cell diversity and immune subtypes associated with prognosis in nasopharyngeal carcinoma
Source: PubMed Central journal article supplement (PMC7784929; doi:10.1038/s41422-020-0374-x), 2020-07-20
Supplement: 41422_2020_374_MOESM17_ESM.pdf [file 41422_2020_374_MOESM17_ESM.pdf]

**Table S5. Five malignant signatures derived from multiple related NMF metagenes**

| Epi-differ 1 |         | Epi-differ 2  |                | Epi-differ 3   |               | Cell cycling |        | Cell secretion |              |
|--------------|---------|---------------|----------------|----------------|---------------|--------------|--------|----------------|--------------|
| CXCL11       | FBP1    | CYP2A6        | RP11-400N13.3  | RGS17          | STATH         | DEPDC1       | FAM64A | BEST2          | GNG4         |
| CSF2         | IGFBP5  | CEACAM7       | SPRR2D         | RP11-734K21.3  | KIF26A        | DLGAP5       | KIF4A  | CPA3           | NLRP7        |
| SAA1         | UGT2B7  | AP001610.9    | RP11-350J20.12 | DSG4           | CTD-2547H18.1 | HJURP        | KIF2C  | MYBPC1         | RPS14        |
| SFN          | LAMB3   | RP11-272B17.2 | UGT2B4         | GPRC5D         | RP11-317L10.1 | PBK          | CENPF  | GNB2L1         | PRR15L       |
| TRAF1        | BHLHE41 | IL36G         | SPNS2          | TGM3           | ITLN1         | TOP2A        | AURKB  | SHH            | CAPN14       |
| SOD2         | KRT6A   | HEPHL1        | SERPINB2       | AC006262.5     | PHGR1         | GTSE1        | KIF14  | RIMS2          | RSPO4        |
| MMP28        | S100A8  | PSAPL1        | SOX8           | RALYL          | PLAC4         | ASPM         | NUF2   | CTD-2521M24.8  | ZBTB16       |
| BDKRB1       | CRYAB   | C4orf19       | IL36RN         | HTR3B          | IL37          | CDC20        | ESCO2  | COL10A1        | LMO3         |
| KRT6B        | RNF19B  | SPRR2E        | RP11-78C3.1    | RP1-63G5.7     | ELF5          | CEP55        | NUSAP1 | EGFL6          | LCE1E        |
| ANGPTL4      | CSTB    | SPRR2A        | SEMG1          | TMPRSS11BNL    | TRIML1        | CKAP2L       | NCAPG  | DNAAF1         | SRGN         |
| CCL5         | AKR1B10 | GPR64         | SPRR2B         | C2orf72        | TMEM45B       | HMMR         | CDCA3  | SDPR           | NHP2         |
| LCE1C        | SAA2    | VNN1          | TMEM255A       | WI2-85898F10.1 | RP11-120C12.3 | NEK2         | CDCA5  | SMAD5-AS1      | ACHE         |
| CHI3L2       | OASL    | GPR110        | RP11-211G23.2  | FETUB          | TMPRSS11B     | BIRC5        | CENPE  | TUBB2B         | PCDH11X      |
| IFI44L       | TREM2   | RP11-798K3.3  | APOBEC3A       | SPINK1         | SPRR3         | CCNA2        | KIF20A | PYDC1          | RP4-639F20.1 |
| MRGPRX3      | KRT6C   | IL19          | RP11-462G2.1   | SYTL5          | C13orf45      | MKI67        | CENPA  | RAMP2          | INSM1        |
| MRGPRX3      | KRT6C   | CYP2A6        | RP11-400N13.3  | RGS17          | STATH         | DEPDC1       | FAM64A | BEST2          | GNG4         |
