# Supplementary material for: Single-cell transcriptomics reveals regulators underlying immune cell diversity and immune subtypes associated with prognosis in nasopharyngeal carcinoma
Source: PubMed Central journal article supplement (PMC7784929; doi:10.1038/s41422-020-0374-x), 2020-07-20
Supplement: 41422_2020_374_MOESM20_ESM.pdf [file 41422_2020_374_MOESM20_ESM.pdf]

**Table S8. Clinical features of NPC Cohort B (n =128)**

| <b>Variable</b>      | <b>No. of patients</b> |
|----------------------|------------------------|
| Age (years)          |                        |
| Median (range)       | 42 (21-72)             |
| Sex                  |                        |
| Male                 | 94                     |
| Female               | 34                     |
| With smoking history |                        |
| Yes                  | 44                     |
| No                   | 84                     |
| Clinical stage       |                        |
| I-II                 | 9                      |
| III-IV               | 119                    |
| Plasma EBV DNA level |                        |
| I-II                 | 9                      |
| III-IV               | 119                    |
